# Supplementary material
Source: Research Square preprint supplement (doi:10.21203/rs.3.rs-9241707/v1)
Supplement: Supplementary file 2 [file 48b1d6ece94a080c295fca45.docx]

**Supplementary Methods**

**Bayesian Inference Model**

*Bayesian inference model of aversive conditioning and extinction in mice:* We postulated that mice infer the latent cause () that generates their observations () of auditory tone or electrical shock at time . Here, the cause refers to the latent contextual state of the environment that generates these observations. For instance, in aversive conditioning and extinction, the true cause of observations is a binary condition of whether threat is presented or omitted, and mice encode this as beliefs about the latent environmental context of aversive or safe. The process of inferring latent context from observations is termed a *latent cause model 1*.

In the latent cause model, mice infer latent context from observations as beliefs. We expressed this process probabilistically using Bayes’ rule, or more precisely, a *partially observable Markov decision process (POMDP)*:

where denotes the mouse’s observation at time . Note that during the conditioned stimulus (CS) phase, this observation includes the belief about shock probability given sound, expressed as (described later). Additionally, represents the context, the latent cause of observations. Here, and denote sequences of observations and contexts, respectively. As evident from the above equation, the latent cause model passively perceives contextual changes in a reactive manner through observations. Hence, this inference process is also referred to as *perceptual inference 2*..

However, organisms do not merely passively infer environmental fluctuations; they may maintain prior contextual beliefs, resisting such changes. Alternatively, they may proactively and actively form contextual beliefs that better predict future states. This inference process, which incorporates agency, is termed *active inference 2,3*. Active inference is achieved by forming contextual beliefs that enable more accurate prediction of future observations, rather than overfitting to current observations alone. In this case, using a policy that controls contextual transitions, the inference process is expressed as:

where is a policy that controls the transition of contextual beliefs toward or , respectively. Additionally, denotes a sequence of policies. Thus, policies formalize the mouse’s agency in shaping its own contextual beliefs, specifying how inferred contexts are actively steered rather than passively updated.

The hippocampus plays a critical role in aversive conditioning, which is commonly modeled using latent cause frameworks 4. These models typically assume that animals passively update their contextual beliefs in response to changes in environmental contingencies, such that rapid reassignment to a new latent cause can readily account for extinction learning. However, explaining persistent or cautious updating of contextual beliefs within these frameworks often relies on imposing strong prior assumptions, such as high self-transition probabilities, low assumed hazard rates, or reduced learning rates driven by beliefs about environmental stability, or on constraining learning dynamics at the model level, rather than treating cautious updating as an emergent consequence of goal-directed inference 5-7. Excessively precise priors clamp posterior estimates, thereby attenuating the influence of prediction errors on inference. Under such conditions, error signals are not expected to substantially drive belief updating.

Based on these considerations, we hypothesize that active inference operates in extinction learning, in which stable and cautious updating of contextual beliefs is necessary to maintain adaptive inference despite abrupt environmental changes. Within this framework, belief updating is coupled to policy selection, allowing animals to regulate the pace of contextual inference in a manner that is consistent with future expected outcomes. This perspective enables a coherent interpretation of non-canonical hippocampal activity observed during context transitions, which is difficult to explain using previous theories alone.

*Bayesian inference algorithm:* To infer the true cause of observations, mice aim to form beliefs about contexts and policies that explain observations with higher precision. We expressed this belief model as a probability distribution :

The mouse’s objective is to form a belief model that perfectly matches the generative model of observations , as defined in Eq. (2). To achieve this, mice minimize the Kullback-Leibler divergence between these two probability models:

where:

This yields the following inequality:

)

The left-hand side is the negative log evidence of the observational data; smaller values indicate that mice can more accurately predict the observational data. The right-hand side is an information-theoretic quantity called *variational free energy*, which in machine learning is termed the *Evidence Lower Bound (ELBO) 8*. This serves as an index of prediction uncertainty in the belief model . That is, by inferring contexts and policies that minimize the free energy on the right-hand side, mice can predict current and future observations with greater accuracy.

This approach is called *variational inference* and has been proposed as a biologically plausible algorithm for agents performing Bayesian inference, which generally has no closed-form analytical solution 2,3,9. In mice, its application has been demonstrated in simulations of T-maze and maze exploration tasks 10, as well as in modeling of probability estimation tasks 11.

*Perception as inference:* In variational inference, mice form beliefs about context by considering contexts that minimize variational free energy at each time step, thereby perceptually estimating the true cause of observations:

Note that this equation is obtained by decomposing variational free energy in the temporal direction, taking partial derivatives with respect to , and organizing the terms for each time 12. Each term in the above equation can be expressed using sufficient statistics with parameters from the generative model . For instance, using sophisticated inference method 3,12,

)

Eq. (7) can be organized by substituting the parameters above as follows:

where . Additionally, . Note that transition probabilities differ depending on the selected policy . We set . represents the entropy of the likelihood matrix .

To convert the above equation back to a probability representation, a sigmoid function is applied to both sides:

In this way, mice infer the context that minimizes variational free energy at each time step, thereby perceptually estimating the true cause of observations.

*Planning as inference and active inference:* As described above, in active inference, mice can prepare different transition probabilities to context depending on the selected policy . This enables mice not only to passively update their contextual beliefs from observations, but also to actively form contextual beliefs that better predict future observations.

We express such optimal contextual beliefs for the future as:

This means that a policy infers a desirable context at next future time point .

The mouse’s task is to form a policy that generates satisfying the above. This is achieved by selecting a policy that minimizes *expected free energy* , which is the free energy with respect to the expected context:

Similar to variational free energy, this can be expressed using parameters of the generative model 10:

…(14)

where is the formed contextual state after selecting policy , and is the contextual state that generates the predicted observation .

*Modeling freezing response:* We assume that mice exhibit freezing when they believe the current context shifts toward aversive state. At this time, the relationship between the mouse’s freezing response and policy is expressed as:

When such a relationship holds, freezing can be concisely expressed using a softmax function:

)

where is a temperature parameter. When , decisions are deterministic (the state with maximum belief is selected), and when , decisions are random.

*Modeling extinction learning:* Extinction learning involves inferring the probability of electrical shock occurring after the CS presentation. This can be expressed as the following conditional probability:

)

is updated on each trial. While exact inference is possible for this value, under variational inference, the following update rule is known 13:

where is the trial index, denotes the observation of shock during the post-CS phase.

Furthermore, to make this update correspond to the mouse’s epistemic process, we replaced the shock observation with contextual beliefs during the post-CS phase when shock is presented:

)

This allows us to link the learning rate of contextual inference during the post-CS phase with the rate of extinction learning during the CS phase.

*State prediction error and vCA1 neuronal activity:* We linked the active inference algorithm to neural activity in the brain. The fundamental idea is to map the Bayesian network of the generative model of observations that mice possess (**Fig. 3a**) to a neural network 8,9,13. In this theory, nodes (points) represented by correspond to brain regions, and edges (arrows) connecting nodes represent information transmission between brain regions.

As described above, we assumed that the hippocampus represents context , the latent cause of observations. We reiterate the update equation for context already derived:

)

In mathematical models of neural networks, the sigmoid function is considered to serve as an activation function (neural activity - firing rate relationship) 9. The log expectation for latent context represents the net excitatory–inhibitory drive of vCA1 neurons rather than a specific electrophysiological signal. In practice, population-level calcium activity provides an indirect but monotonic readout of this drive. Therefore, the log expectation for latent context is interpreted as the neural activation of neurons or neuronal populations encoding context . We measured neural responses at the single-cell level in vCA1 (**Fig. 1e**). Thus, by mapping the neural activation of vCA1 neurons to the active inference model, we could examine whether the hippocampus represents context .

For simplicity, we denoted the neural responses of vCA1 neurons as . Following equation (22), the prediction error for latent contextual belief , namely the *(contextual) state prediction error* , is expressed as the temporal change in neural responses of vCA1 neurons:

Focusing on equation (7) and (9), this corresponds to the negative gradient of variational free energy:

Here, we assumed that latent context is inferred through gradient descent minimization of variational free energy. At this time, latent contextual belief is expressed by the following update rule using the membrane potential of vCA1 neurons and state prediction error 2:

)

where is the learning rate.

Next, we derived the state prediction error computed by vCA1 as a whole. Now, a subset of vCA1 neurons encode two contexts: aversive and safe. Noting that is an error signal, the difference in activity changes between the two antagonistic contexts is:

For vCA1 representing both aversive and safe contexts, this yields a straightforward interpretation: positive values promote updates toward the aversive context, while negative values promote updates toward the safe context.

*Control error and vCA1 projections signal:* In this section, we defined “belief-maintenance signals”. The basic idea is to assume that mice post hoc evaluate whether the policy they selected led them toward a desirable state. Within the active inference framework, we formalized this evaluation in terms of a control error, defined as a policy-dependent deviation between current contextual beliefs and desirable contextual states. This notion of control error is formally related to, but distinct from, a state prediction error. A state prediction error reflects a mismatch between inferred environmental states and their predictions under prior beliefs and serves to update beliefs about the environment; it thus constitutes an error in perceptual inference. In contrast, a control error evaluates whether the selected policy moved the system closer to an expected (desirable) state; it therefore constitutes an error in active inference.

First, continuing under the assumption that vCA1 represents context , we examine projection signals from vCA1 neurons. Examining the Bayesian network of the generative model (**Fig. 3a**), we see that context transmits information to policy . On the Bayesian network, policy is positioned as an upstream node relative to context . Corresponding directly to hippocampal functional connectivity, we assumed that vmPFC, NAc, and BA are associated with posterior about policy , i.e., active control of transitions in context . The policy update rule has already been derived:

)

)

)

Note that, to consider minimization, we examine the negative of expected free energy , factor out , and denote the remaining factor as . Indeed, is expressed as the product of the transitioned context and the message , indicating that policy inference is influenced by hippocampal state and their weighting factor.

Next, we formalized projection signals from vCA1 neurons as a mechanism for post hoc evaluation of the selected policy. Let denote the policy selected at the previous time step. To examine the optimal target context , similar to variational free energy , we differentiated expected free energy with respect to and found the point where the value is minimized:

*)*

Here, we ignored the term , which is a vector of all ones, because it does not affect minimization 2. That is, quantifies the extent to which the selected policy displaced the current contextual belief away from a desired context.

To clarify the interpretation of the role of , we explicitly noted the following relationship, which can be readily derived from equation (27) but is worth stating for clarity:

When there is no ambiguity in the mapping relationship between context and observation (e.g., when it is an identity matrix), the entropy term converges to zero. Therefore, in simple task settings such as aversive conditioning, the optimal strategy to minimize expected free energy is to control contextual beliefs via policy such that they match the context yields desirable observations. i.e.,

)

In summary, serves as an index representing the error between the context state actively controlled by policy and the desirable context state. We termed this *control error* for convenience. Note that, similar to latent context , policy updates are performed via gradient descent.

is a difference between log contextual beliefs i.e., . Thus, similar to state prediction error , the integrated message projected from the hippocampus can be straightforwardly interpreted:

)

When this value is negative, it indicates that policy control toward the safe context is still needed to reach the desirable contextual belief; when positive, it indicates that policy control toward the aversive context is needed.

*Relationship between freezing response and control error:* We examined the relationship between freezing response and control error . Mice exhibit freezing when they believe the current context is likely aversive (Eq. 16).

Consider the case when is negative. As described above, this indicates that transitions toward the safe context should be promoted. Such transitions are necessary when the mouse’s aversive belief is high. Therefore, based on the definition of freezing in the model (Eq. 16), when is negative, mice are likely to exhibit freezing response (**Fig. 4e, h**).

Conversely, when is positive, this indicates that transitions toward the aversive context should be promoted. At this time, the current contextual belief is expected to be in a safe state, so mice are unlikely to exhibit freezing response (**Fig. 4e, h**).

*Manipulations of error:* However, these results (**Fig. 4e, h**) alone cannot distinguish whether mice perform active inference and whether the message projected from the hippocampus is a control error . This is because state prediction error and freezing response show a similar relationship. For example, if state prediction error were negative, this would indicate that beliefs should be updated toward the safe context. Therefore, since the current contextual belief is likely in an aversive state, mice are likely to exhibit freezing response according to the definition of freezing in the model. Conversely, when positive, the opposite holds.

To distinguish between state prediction error and control error , we simulated optogenetic manipulation of vCA1 terminal activity during post-CS periods. This means activating projection signals from vCA1 (control error or state prediction error) to baseline activity levels (i.e., clamping the error signal to zero).

First, consider activation of state prediction error :

)

Therefore, when , state prediction error becomes zero. While this is self-evident from the definition, when state prediction error is zero, contextual updates do not occur, and learning and behavioral changes do not progress. This reflects the typical role of prediction error: the larger the prediction error, the more learning progresses.

In contrast, control error exhibits the opposite pattern:

)

)

Therefore, when , control error becomes zero. Recall that is obtained by differentiating expected free energy with respect to to examine the optimal target context. That is, clamping the error to zero means reinforcing a policy that controls contextual beliefs toward a contextual state that enables desirable observations. Therefore, artificially manipulating the error to be smaller brings contextual beliefs closer to a contextual state that achieves desirable observations.

More directly, we can demonstrate that state prediction error and control error exhibit opposite dynamics. For this purpose, using , we explicitly included state prediction error in control error:

At this time, for example, suppose has high belief in the aversive context, while has high belief in the safe context. And we set the policy to transition to safe. This setting is typical at the initial stage of the post-CS phase. If we make larger (more negative) than normal, the first term transitions more toward the safe context, so becomes smaller.

In this way, state prediction error and control error exhibit different effects on behavior determined by context and its value when artificial manipulation is performed. Indeed, we confirmed that activating vCA1 terminal activity during post-CS periods promotes extinction learning, in opposition to the effects of state prediction error (**Fig. 2j**).

To verify this result in simulations using the logic presented above, we can implement nonlinear enhancement, for example, where neuronal activity is not optogenetically enhanced when it is zero, but is increasingly enhanced as activity increases:

)

where is a parameter representing the strength of manipulation. Under the natural condition, the model assumes a decrease in precision following omission of expected outcomes, resulting in reduced belief updating (maintenance of aversive beliefs). In the optogenetic activation condition, artificially increasing precision counteracts this bias, promoting belief updating and facilitating extinction.

Importantly, the model does not assume that vCA1 activity directly inhibits learning. Instead, vCA1 modulates the precision of prediction errors, effectively biasing belief updating toward the maintenance of prior contextual beliefs (belief rigidity). This interpretation reconciles the seemingly paradoxical finding that vCA1 suppression accompanies both the omission of expected outcomes and resistance to extinction.

*Freezing-triggered analysis in inference model:* Control errors were aligned to binarized behavioral data (freezing or not freezing) and triggered at the onset or offset of freezing epochs during the post-CS period across the entire session. Signals within 1-second window before and after each event were extracted. Epochs were excluded if another freezing event occurred within the time window. Subsequently, the extracted signals were averaged and z-score normalized.

*Summary:* We argue that mice update their beliefs about the latent environmental state solely through perceptual inference, but also through active inference. Importantly, under the assumption of post hoc evaluation of selected policies, the control error introduced in this study plays a role distinct from that of conventional prediction errors. This distinction becomes particularly evident in the context of optogenetic manipulation, where it provides a coherent account of otherwise counterintuitive observations, such as learning progressing as error is reduced. Although we relate this control error in detail in relation to underlying brain structures, we do not introduce new assumptions or mechanisms. Rather, the proposed framework represents an interpretation within the existing theory of active inference, and, as shown in the next section, the underlying algorithm is identical to that of active inference itself. The value of this model therefore lies in demonstrating that the present results can be consistently interpreted within a conventional theoretical framework.

**Simulation**

*Parameters:* We assumed the generative model of mouse observations as a Bayesian network as shown in Fig. 3a. This model architecture was constructed based on the previous report 8, which establishes a framework for designing valid neural network architectures that minimize free energy. Consider that the mouse’s belief models for are expressed as categorical distributions, i.e., . At this time, the mouse’s inference model (Eq. 2) can be expressed using matrix representations as follows:

Here, is the likelihood matrix that maps states to observations:

In our simulations, we used a mapping with deterministic noise where and .

is the transition matrix that governs transitions from previous states to next states:

The subscript of indicates that different transition matrices are prepared depending on the selected policy . In our study, we set with , and with .

The observation preference matrix represents prior beliefs about each observation and involves learning at each time frame:

Mice have prior beliefs about observations because the relationship changes through extinction learning. To express the learning rule for such prior beliefs , we first introduce the target distribution of observation 14:

where is the observation converted to a unit vector:

Additionally, is the probability that mice believe electrical shock will occur in the post-CS phase when an auditory stimulus is given during the CS (Eq. 19). Assuming learning at each time frame, ultimately follows the following learning rule:

However, in this study, we did not perform summation over and used only the most recent observation.

The initial state distribution represents the prior for the initial state :

In the first trial, we set ; in subsequent trials, we directly inherited the final state probability from the most recent trial.

Finally, is the prior for policies:

As already shown, policies can be expressed using the negative expected free energy, which we constructed using parameters of the generative model as follows:

*Algorithm:* The algorithm for the active inference simulation of aversive conditioning implemented in this study is shown Supplementary Text. We first set a random seed and, as in the experimental conditions, repeated active inference trials 40 times per mouse. This was performed for 10 mice. Summary statistics (means, variances, etc.) for each variable and parameter followed the analytical approach of this study. We set to 0.2, 0.13, and 0.1, respectively.

Glossary of terms and notation.

| Notation | Meaning | Type |
| --- | --- | --- |
|  | Time step index and total number of time steps in the trial | Positive integers |
|  | Set of all possible observations at time | Finite set: (pre-CS/post-CS phase), (CS phase) |
| , | Observation at time and sequence of observations . If evaluates to the th possible observation, interpret it as the th unit vector in | Random variable over : , Random variable over : |
|  | Set of all possible (hidden) states at time | Finite set (cardinality ): |
| , | (Hidden) state at time and sequence of hidden states . If evaluates to the th possible state, interpret it as the th unit vector in | Random variable over : , Random variable over : |
|  | Set of all possible policies (actions) at time | Finite set: |
| , | Policy (action) at time and sequence of policies | Random variable over : , or element of (depending on context), Random variable over : |
|  | Set of all possible freezing responses at time | Finite set: |
|  | Freezing response at time . | Random variable over : |
|  | Probability distribution. Specifically, the true probability distribution over latent variables of the generative model | Probability distribution |
|  | Probability distribution. Specifically, the approximate posterior distribution over latent variables of the generative model | Probability distribution |
|  | Belief distribution over observation . | Vector (Probability Vector): |
|  | Belief distribution over hidden state . | Vector (Probability Vector): |
|  | Belief distribution over policy . | Vector (Probability Vector): |
|  | Categorical distribution | Probability distribution |
|  | Dirichlet distribution (conjugate prior of the categorical distribution) | Probability distribution |
|  | Likelihood matrix. Mapping from states to observations. | Matrix (elements: where , ) |
|  | Transition probability matrix given policy . | Matrix (elements: where ) |
|  | Preference over observations at time . Represents prior beliefs about each observation. | Vector (Probability Vector, elements: where ) |
|  | Parameter vector of . | Vector (positive real numbers) |
|  | Probability that mouse believes shock will occur post-CS when sound is observed during CS in a trial. . | Vector (Probability Vector, elements: where ) |
|  | Parameter vector of . | Vector (positive real numbers) |
|  | Initial state distribution. | Vector (Probability Vector, elements: where ) |
|  | Prior over policies at time . | Vector (Probability Vector, elements: where ) |
|  | Entropy of the likelihood matrix . | Vector |
|  | Kullback-Leibler divergence between probability distributions and | Real number |
|  | Variational free energy. | Functional (returns real number) |
| , | State prediction error and its projection signal. , | Vector: (elements: where ), Real number: |
|  | Prediction error after optogenetic enhancement. | Vector |
|  | Expected free energy when policy is selected. | Function (returns real number) |
| , | Control error and its projection signal. Quantifies post hoc how much the selected policy displaced the current contextual belief away from a desired contextual state. , | Vector: (elements: where ), Real number: |
|  | Contextual state after selecting policy . | Vector: |
|  | Contextual state that generates the expected observation. | Vector: |
|  | Softmax function (normalized exponential function). | Function |
|  | Natural logarithm. Applied element-wise to vectors and matrices | Function |
|  | Inner product. | Operator |
|  | Outer product (Kronecker product) | Operator |
|  | Element-wise product | Operator |

The algorithm for the active inference simulation


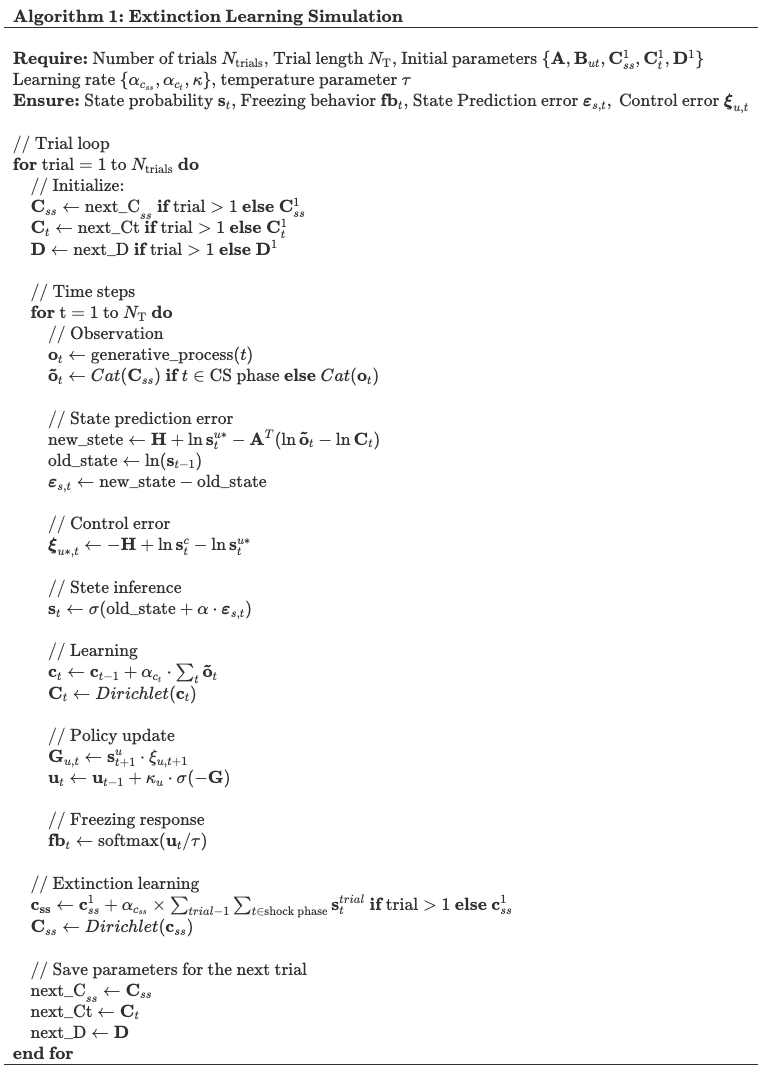


**References**

1 Gershman, S. J. & Niv, Y. Exploring a latent cause theory of classical conditioning. *Learning & behavior* **40**, 255-268 (2012).

2 Da Costa, L. *et al.* Active inference on discrete state-spaces: A synthesis. *Journal of Mathematical Psychology* **99**, 102447 (2020).

3 Friston, K. *et al.* Active inference and learning. *Neurosci Biobehav Rev* **68**, 862-879 (2016).

4 Anagnostaras, S. G., Gale, G. D. & Fanselow, M. S. Hippocampus and contextual fear conditioning: recent controversies and advances. *Hippocampus* **11**, 8-17 (2001).

5 Behrens, T. E., Woolrich, M. W., Walton, M. E. & Rushworth, M. F. Learning the value of information in an uncertain world. *Nat Neurosci* **10**, 1214-1221 (2007).

6 Glaze, C. M., Kable, J. W. & Gold, J. I. Normative evidence accumulation in unpredictable environments. *Elife* **4** (2015).

7 Powers, A. R., Mathys, C. & Corlett, P. R. Pavlovian conditioning-induced hallucinations result from overweighting of perceptual priors. *Science* **357**, 596-600 (2017).

8 Isomura, T., Shimazaki, H. & Friston, K. J. Canonical neural networks perform active inference. *Communications Biology* **5**, 55 (2022).

9 Friston, K. J., Parr, T. & de Vries, B. The graphical brain: Belief propagation and active inference. *Network neuroscience* **1**, 381-414 (2017).

10 Friston, K., Da Costa, L., Hafner, D., Hesp, C. & Parr, T. Sophisticated inference. *Neural Computation* **33**, 713-763 (2021).

11 Konaka, Y. & Naoki, H. Decoding reward–curiosity conflict in decision-making from irrational behaviors. *Nature Computational Science* **3**, 418-432 (2023).

12 Parr, T. & Friston, K. J. Generalised free energy and active inference. *Biological cybernetics* **113**, 495-513 (2019).

13 Parr, T., Pezzulo, G. & Friston, K. J. *Active inference: the free energy principle in mind, brain, and behavior*. (MIT Press, 2022).

14 van de Laar, T., Koudahl, M., van Erp, B. & de Vries, B. Active inference and epistemic value in graphical models. *Frontiers in Robotics and AI* **9**, 794464 (2022).

**Supplementary Tables**

Supplementary Table 1

| Figure | Sample | Sample size | Normality | Statistical methods | Statistical results |
| --- | --- | --- | --- | --- | --- |
| Fig.1f | CSupPostdown Extinction CS AUC CS- vs CSearly vs CSlate | 57 | NA | Friedman test   *post-hoc* Dunn's multiple comparison test | Friedmann test: P = 0.0001 Dunn's multiple comparison test: CS- vs CSearly, P = 0.0004 CS- vs CSlate , P > 0.9999 CSearly vs CSlate, P = 0.0016 |
| Fig.1f | CSupPostdown Extinction post-CS AUC CS- vs CSearly vs CSlate | 57 | NA | Friedman test   *post-hoc* Dunn's multiple comparison test | Friedmann test: P < 0.0001 Dunn's multiple comparison test: CS- vs CSearly, P < 0.0001 CS- vs CSlate , P > 0.9999 CSearly vs CSlate, P < 0.0001 |
| Fig.1g | CSdownPostdown Extinction CS AUC CS- vs CSearly vs CSlate | 104 | NA | Friedman test   *post-hoc* Dunn's multiple comparison test | Friedmann test: P < 0.0001 Dunn's multiple comparison test: CS- vs CSearly, P < 0.0001 CS- vs CSlate , P= 0.0948 CSearly vs CSlate, P < 0.0001 |
| Fig.1g | CSdownPostdown Extinction post-CS AUC CS- vs CSearly vs CSlate | 104 | NA | Friedman test   *post-hoc* Dunn's multiple comparison test | Friedmann test: P < 0.0001 Dunn's multiple comparison test: CS- vs CSearly, P < 0.0001 CS- vs CSlate , P > 0.9999 CSearly vs CSlate, P < 0.0001 |
| Fig.1i | pre-CS1 weight CSupPostdown, CSnoPostdown, CSdownPostdown vs others | 57, 46, 104, 191 | NA | Kruskal-Wallis test | P = 0.8009 |
| Fig.1i | pre-CS2 weight CSupPostdown, CSnoPostdown, CSdownPostdown vs others | 57, 46, 104, 191 | NA | Kruskal-Wallis test  *post-hoc* Dunn's multiple comparison test | Kruskal-Wallis test: P = 0.0215 Dunn's multiple comparison test: CSupPostdown vs others, P = 0.2363 CSnoPostdown vs others, P = 0.1226 CSdownPostdown vs others, P > 0.9999 |
|  | pre-CS3 weight CSupPostdown, CSnoPostdown, CSdownPostdown vs others | 57, 46, 104, 191 | NA | Kruskal-Wallis test | P = 0.2200 |
| Fig.1i | pre-CS4 weight CSupPostdown, CSnoPostdown, CSdownPostdown vs others | 57, 46, 104, 191 | NA | Kruskal-Wallis test | P = 0.1325 |
| Fig.1i | CS1 weight CSupPostdown, CSnoPostdown, CSdownPostdown vs others | 57, 46, 104, 191 | NA | Kruskal-Wallis test  *post-hoc* Dunn's multiple comparison test | Kruskal-Wallis test: P = 0.0357 Dunn's multiple comparison test: CSupPostdown vs others, P = 0.6113 CSnoPostdown vs others , P = 0.4223 CSdownPostdown vs others, P = 0.2097 |
| Fig.1i | CS2 weight CSupPostdown, CSnoPostdown, CSdownPostdown vs others | 57, 46, 104, 191 | NA | Kruskal-Wallis test  *post-hoc* Dunn's multiple comparison test | Kruskal-Wallis test: P = 0.0243 Dunn's multiple comparison test: CSupPostdown vs others, P = 0.0103 CSnoPostdown vs others , P > 0.9999 CSdownPostdown vs others, P = 0.2980 |
| Fig.1i | CS3 weight CSupPostdown, CSnoPostdown, CSdownPostdown vs others | 57, 46, 104, 191 | NA | Kruskal-Wallis test  *post-hoc* Dunn's multiple comparison test | Kruskal-Wallis test: P = 0.0101 Dunn's multiple comparison test: CSupPostdown vs others, P = 0.0119 CSnoPostdown vs others , P = 0.8999 CSdownPostdown vs others, P > 0.9999 |
| Fig.1i | CS4 weight CSupPostdown, CSnoPostdown, CSdownPostdown vs others | 57, 46, 104, 191 | NA | Kruskal-Wallis test  *post-hoc* Dunn's multiple comparison test | Kruskal-Wallis test: P = 0.0011 Dunn's multiple comparison test: CSupPostdown vs others, P = 0.0003 CSnoPostdown vs others , P > 0.9999 CSdownPostdown vs others, P = 0.2473 |
| Fig.1i | post-CS1 weight CSupPostdown, CSnoPostdown, CSdownPostdown vs others | 57, 46, 104, 191 | NA | Kruskal-Wallis test | P = 0.1213 |
| Fig.1i | post-CS2 weight CSupPostdown, CSnoPostdown, CSdownPostdown vs others | 57, 46, 104, 191 | NA | Kruskal-Wallis test  *post-hoc* Dunn's multiple comparison test | Kruskal-Wallis test: P = 0.0175 Dunn's multiple comparison test: CSupPostdown vs others, P = 0.0046 CSnoPostdown vs others , P > 0.9999 CSdownPostdown vs others, P > 0.9999 |
| Fig.1i | post-CS3 weight CSupPostdown, CSnoPostdown, CSdownPostdown vs others | 57, 46, 104, 191 | NA | Kruskal-Wallis test  *post-hoc* Dunn's multiple comparison test | Kruskal-Wallis test: P = 0.0304 Dunn's multiple comparison test: CSupPostdown vs others, P = 0.0094 CSnoPostdown vs others , P > 0.9999 CSdownPostdown vs others, P = 0.6241 |
| Fig.1i | post-CS4 weight CSupPostdown, CSnoPostdown, CSdownPostdown vs others | 57, 46, 104, 191 | NA | Kruskal-Wallis test | P = 0.1276 |
| Fig.2e | vmPFC Aversive condition CS peak CS+1 vs CS+5 | 8 | normal | Paired t test | T(7) = -3.2604, P = 0.013858 |
| Fig.2e | vmPFC Aversive condition shock peak CS+1 vs CS+5 | 8 | normal | Paired t test | T(7) = 2.8670, P = 0.024094 |
| Fig.2e | NAc Aversive condition CS peak CS+1 vs CS+5 | 9 | normal | Paired t test | T(8) = -1.8660, P = 0.0990 |
| Fig.2e | NAc Aversive condition shock peak CS+1 vs CS+5 | 9 | non-normal | Wilcoxon matched-pairs signed rank test | P = 0.0742 |
| Fig.2e | BA Aversive condition CS peak CS+1 vs CS+5 | 11 | normal | Paired t test | T(10) = -2.5911, P = 0.026897 |
| Fig.2e | BA Aversive condition shock peak CS+1 vs CS+5 | 11 | normal | Paired t test | T(10) = 2.1012, P = 0.0620 |
| Fig.2g | vmPFC Extinction CS AUC CSearly vs CSlate | 8 | normal | Paired t test | T(7) = 1.9244, P = 0.0957 |
| Fig.2g | vmPFC Extinction post-CS AUC CSearly vs CSlate | 8 | normal | Paired t test | T(7) = -2.6901, P = 0.031083 |
| Fig.2g | NAc Extinction CS AUC CSearly vs CSlate | 9 | normal | Paired t test | T(8) = 2.1072, P = 0.0682 |
| Fig.2g | NAc Extinction post-CS AUC CSearly vs CSlate | 9 | normal | Paired t test | T(8) = -3.5248, P = 0.0077911 |
| Fig.2g | BA Extinction CS AUC CSearly vs CSlate | 11 | normal | Paired t test | T(10) = 3.2545, P = 0.0086546 |
| Fig.2g | BA Extinction post-CS AUC CSearly vs CSlate | 11 | normal | Paired t test | T(10) = -3.5874, P = 0.0049502 |
| Fig.3c | vmPFC inhibition Aversive condition freezing during CS Jaws vs control | 12, 16 | NA | Two-way RM ANOVA  *post-hoc* Holm sidak test | interaction: F4,104 = 1.379, P = 0.2464 main effect of inhibition: F1,26 = 5.728, P = 0.0242 |
| Fig.3c | vmPFC inhibition Extinction freezing during CS Jaws vs control | 12, 16 | NA | Two-way RM ANOVA  *post-hoc* Holm sidak test | interaction: F19,494 = 0.7597, P = 0.7555 main effect of inhibition: F1,26 = 2.700, P = 0.1124 |
| Fig.3c | vmPFC inhibition Retrieval freezing during CS Jaws vs control | 12, 16 | NA | Two-way RM ANOVA  *post-hoc* Holm sidak test | interaction: F2,52 = 0.4371, P = 0.6482 main effect of inhibition: F1,26 = 9.563, P = 0.0047 |
| Fig.3c | NAc inhibition Aversive condition freezing during CS Jaws vs control | 7, 8 | NA | Two-way RM ANOVA  *post-hoc* Holm sidak test | interaction: F4,52 = 1.609, P = 0.1860 main effect of inhibition: F1,13 = 1.840, P = 0.1980 |
| Fig.3c | NAc inhibition Extinction freezing during CS Jaws vs control | 7, 8 | NA | Two-way RM ANOVA  *post-hoc* Holm sidak test | interaction: F19,247 = 0.4219, P = 0.9850 main effect of inhibition: F1,13 = 6.433, P = 0.0248 |
| Fig.3c | NAc inhibition Retrieval freezing during CS Jaws vs control | 7, 8 | NA | Two-way RM ANOVA  *post-hoc* Holm sidak test | interaction: F2,26 = 0.8791, P = 0.4272 main effect of inhibition: F1,13 = 0.1711, P = 0.6859 |
| Fig.3c | BA inhibition Aversive condition freezing during CS Jaws vs control | 14, 16 | NA | Two-way RM ANOVA  *post-hoc* Holm sidak test | interaction: F4,112 = 0.5158, P = 0.7243 main effect of inhibition: F1,28 = 0.004014, P = 0.9499 |
| Fig.3c | BA inhibition Extinction freezing during CS Jaws vs control | 14, 16 | NA | Two-way RM ANOVA  *post-hoc* Holm sidak test | interaction: F19,532 = 1.252, P = 0.2100 main effect of inhibition: F1,28 = 1.088, P = 0.3059 |
| Fig.3c | BA inhibition Retrieval freezing during CS Jaws vs control | 14, 16 | NA | Two-way RM ANOVA  *post-hoc* Holm sidak test | interaction: F2,56 = 1.626, P = 0.2058 main effect of inhibition: F1,28 = 4.400, P = 0.0451 |
| Fig.3d | vmPFC activation Aversive condition freezing during CS Chrimson vs control | 8, 10 | NA | Two-way RM ANOVA  *post-hoc* Holm sidak test | interaction: F4,64 = 0.2817, P = 0.8888 main effect of activation: F1,16 = 0.7088, P = 0.4123 |
| Fig.3d | vmPFC activation Extinction freezing during CS Chrimson vs control | 8, 10 | NA | Two-way RM ANOVA  *post-hoc* Holm sidak test | interaction: F19,304 = 1.515, P = 0.0784 main effect of activation: F1,16 = 9.610, P = 0.0069 |
| Fig.3d | vmPFC activation Retrieval freezing during CS Chrimson vs control | 8, 10 | NA | Two-way RM ANOVA  *post-hoc* Holm sidak test | interaction: F2,32 = 0.4550, P = 0.6385 main effect of activation: F1,16 = 3.079, P = 0.0984 |
| Fig.3d | NAc activation Aversive condition freezing during CS Chrimson vs control | 8, 11 | NA | Two-way RM ANOVA  *post-hoc* Holm sidak test | interaction: F4,68 = 1.979, P = 0.1075 main effect of activation: F1,17 = 5.081e-005, P = 0.9944 |
| Fig.3d | NAc activation Extinction freezing during CS Chrimson vs control | 8, 11 | NA | Two-way RM ANOVA  *post-hoc* Holm sidak test | interaction: F19,323 = 0.4261, P = 0.9845 main effect of activation: F1,17 = 0.1237, P = 0.7294 |
| Fig.3d | NAc activation Retrieval freezing during CS Chrimson vs control | 8, 11 | NA | Two-way RM ANOVA  *post-hoc* Holm sidak test | interaction: F2,34 = 4.402, P = 0.0200 main effect of activation: F1,17 = 0.07972, P = 0.7811 |
| Fig.3d | BA activation Aversive condition freezing during CS Chrimson vs control | 7, 11 | NA | Two-way RM ANOVA  *post-hoc* Holm sidak test | interaction: F4,64 = 0.6829, P = 0.6064 main effect of activation: F1,16 = 2.975, P = 0.1038 |
| Fig.3d | BA activation Extinction freezing during CS Chrimson vs control | 7, 11 | NA | Two-way RM ANOVA  *post-hoc* Holm sidak test | interaction: F19,304 = 1.728, P = 0.0310 main effect of activation: F1,16 = 5.644, P = 0.0303 |
| Fig.3d | BA activation Retrieval freezing during CS Chrimson vs control | 7, 11 | NA | Two-way RM ANOVA  *post-hoc* Holm sidak test | interaction: F2,32 = 0.3051, P = 0.7391 main effect of activation: F1,16 = 7.653, P = 0.0138 |
| Fig.5b | Model freeze vs non-freeze | 30 | normal | Paired t test | T(29) = -6.0618, P < 0.0001 |
| Fig.5d | Model freezing onset before vs after onset | 30 | normal | Paired t test | T(13) = 2.661, P = 0.0196 |
| Fig.5d | Model freezing offset before vs after offset | 30 | non-normal | Wilcoxon matched-pairs signed rank test | P = 0.0233 |
| Fig.5f | CSupPostdown freeze vs non-freeze | 57 | non-normal | Wilcoxon matched-pairs signed rank test | P < 0.0001 |
| Fig.5h | CSupPostdown freezing onset before vs after onset | 57 | NA | Wilcoxon matched-pairs signed rank test | P < 0.0001 |
| Fig.5h | CSupPostdown freezing offset before vs after offset | 57 | NA | Wilcoxon matched-pairs signed rank test | P < 0.0001 |
| Fig.5j | vmPFC freeze vs non-freeze | 8 | normal | Paired t test | T(7) = 6.665, P = 0.0003 |
| Fig.5j | NAc freeze vs non-freeze | 9 | normal | Paired t test | T(8) = 6.194, P = 0.0003 |
| Fig.5j | BA freeze vs non-freeze | 11 | normal | Paired t test | T(10) = 6.160, P = 0.0001 |
| Fig.5k | vmPFC freezing onset before vs after onset | 8 | non-normal | Wilcoxon matched-pairs signed rank test | P = 0.0156 |
| Fig.5k | vmPFC freezing offset before vs after offset | 8 | non-normal | Wilcoxon matched-pairs signed rank test | P = 0.0078 |
| Fig.5k | NAc freezing onset before vs after onset | 9 | normal | Paired t-test | T(8) = 57.79, P < 0.0001 |
| Fig.5k | NAc freezing offset before vs after offset | 9 | non-normal | Wilcoxon matched-pairs signed rank test | P = 0.0039 |
| Fig.5k | BA freezing onset before vs after onset | 11 | non-normal | Wilcoxon matched-pairs signed rank test | P = 0.0020 |
| Fig.5k | BA freezing offset before vs after offset | 11 | non-normal | Wilcoxon matched-pairs signed rank test | P = 0.0010 |
| Fig.6b | vmPFC freezing-triggered inhibition Aversive condition freezing during CS Jaws vs control | 6, 6 | NA | Two-way RM ANOVA  *post-hoc* Holm sidak test | interaction: F4, 40 = 0.2506, P = 0.9076 main effect of inhibition: F1, 10 = 0.4166, P = 0.5332 |
| Fig. 6b | vmPFC freezing-triggered inhibition Extinction freezing during CS Jaws vs control | 6, 6 | NA | Two-way RM ANOVA  *post-hoc* Holm sidak test | interaction: F19, 190 = 1.183, P = 0.2758 main effect of inhibition: F1, 10 = 1.425, P = 0.2601 |
| Fig. 6b | vmPFC freezing-triggered inhibition Retrieval freezing during CS Jaws vs control | 6, 6 | NA | Two-way RM ANOVA  *post-hoc* Holm sidak test | interaction: F2, 20 = 1.221, P = 0.3160 main effect of inhibition: F1, 10 = 8.247, P = 0.0166 |
| Fig. 6b | NAc freezing-triggered inhibition Aversive condition freezing during CS Jaws vs control | 4, 4 | NA | Two-way RM ANOVA  *post-hoc* Holm sidak test | interaction: F4, 24 = 0.2929, P = 0.8797 main effect of inhibition: F1, 6 = 0.1269, P = 0.7339 |
| Fig. 6b | NAc freezing-triggered inhibition Extinction freezing during CS Jaws vs control | 4, 4 | NA | Two-way RM ANOVA  *post-hoc* Holm sidak test | interaction: F19, 114 = 0.9063, P = 0.5762 main effect of inhibition: F1, 6 = 15.93, P = 0.0072 |
| Fig. 6b | NAc freezing-triggered inhibition Retrieval freezing during CS Jaws vs control | 4, 4 | NA | Two-way RM ANOVA  *post-hoc* Holm sidak test | interaction: F2, 12 = 0.7619, P = 0.4881 main effect of inhibition: F1, 6 = 5.821, P = 0.0524 |
| Fig. 6b | BA freezing-triggered inhibition Aversive condition freezing during CS Jaws vs control | 6, 8 | NA | Two-way RM ANOVA  *post-hoc* Holm sidak test | interaction: F4, 48 = 3.374, P = 0.0164 main effect of inhibition: F1, 12 = 0.03856, P = 0.8476 |
| Fig. 6b | BA freezing-triggered inhibition Extinction freezing during CS Jaws vs control | 6, 8 | NA | Two-way RM ANOVA  *post-hoc* Holm sidak test | interaction: F19, 228 = 1.924, P = 0.0134 main effect of inhibition: F1, 12 = 1.286, P = 0.2788 |
| Fig. 6b | BA freezing-triggered inhibition Retrieval freezing during CS Jaws vs control | 6, 8 | NA | Two-way RM ANOVA  *post-hoc* Holm sidak test | interaction: F2, 24 = 1.624, P = 0.2179 main effect of inhibition: F1, 12 = 0.03378, P = 0.8573 |
| Fig. 6c | vmPFC non-freezing-triggered inhibition Aversive condition freezing during CS Jaws vs control | 5, 5 | NA | Two-way RM ANOVA  *post-hoc* Holm sidak test | interaction: F4, 32 = 0.9989, P = 0.4225 main effect of inhibition: F1, 8 = 0.02370, P = 0.8815 |
| Fig. 6c | vmPFC non-freezing-triggered inhibition Extinction freezing during CS Jaws vs control | 5, 5 | NA | Two-way RM ANOVA  *post-hoc* Holm sidak test | interaction: F19, 152 = 0.8063, P = 0.6970 main effect of inhibition: F1, 8 = 0.004322, P = 0.9492 |
| Fig. 6c | vmPFC non-freezing-triggered inhibition Retrieval freezing during CS Jaws vs control | 5, 5 | NA | Two-way RM ANOVA  *post-hoc* Holm sidak test | interaction: F2, 16 = 0.5935, P = 0.5641 main effect of inhibition: F1, 8 = 3.089, P = 0.1169 |
| Fig. 6c | NAc non-freezing-triggered inhibition Aversive condition freezing during CS Jaws vs control | 3, 4 | NA | Two-way RM ANOVA  *post-hoc* Holm sidak test | interaction: F4, 20 = 0.9415, P = 0.4604 main effect of inhibition: F1, 5 = 0.3150, P = 0.5989 |
| Fig. 6c | NAc non-freezing-triggered inhibition Extinction freezing during CS Jaws vs control | 3, 4 | NA | Two-way RM ANOVA  *post-hoc* Holm sidak test | interaction: F19, 95 = 1.493, P = 0.1058 main effect of inhibition: F1, 5 = 0.8211, P = 0.4064 |
| Fig. 6c | NAc non-freezing-triggered inhibition Retrieval freezing during CS Jaws vs control | 3, 4 | NA | Two-way RM ANOVA  *post-hoc* Holm sidak test | interaction: F2, 10 = 0.1224, P = 0.8861 main effect of inhibition: F1, 5 = 0.04788, P = 0.8354 |
| Fig. 6c | BA non-freezing-triggered inhibition Aversive condition freezing during CS Jaws vs control | 8, 7 | NA | Two-way RM ANOVA  *post-hoc* Holm sidak test | interaction: F4, 52 = 1.299, P = 0.2825 main effect of inhibition: F1, 13 = 0.2922, P = 0.5979 |
| Fig. 6c | BA non-freezing-triggered inhibition Extinction freezing during CS Jaws vs control | 8, 7 | NA | Two-way RM ANOVA  *post-hoc* Holm sidak test | interaction: F19, 247 = 1.515, P = 0.0805 main effect of inhibition: F1, 13 = 0.01827, P = 0.8946 |
| Fig. 6c | BA non-freezing-triggered inhibition Retrieval freezing during CS Jaws vs control | 8, 7 | NA | Two-way RM ANOVA  *post-hoc* Holm sidak test | interaction: F2, 26 = 0.4148, P = 0.6648 main effect of inhibition: F1, 13 = 0.0007962, P = 0.9779 |
| Extended Data Fig. 1e | CSupPostup Extinction CS AUC CS- vs CSearly vs CSlate | 59 | NA | Friedman test   *post-hoc* Dunn's multiple comparison test | Friedmann test: P < 0.0001 Dunn's multiple comparison test: CS- vs CSearly, P < 0.0001 CS- vs CSlate , P > 0.9999 CSearly vs CSlate, P < 0.0001 |
| Extended Data Fig. 1e | CSupPostup Extinction post-CS AUC CS- vs CSearly vs CSlate | 59 | NA | Friedman test   *post-hoc* Dunn's multiple comparison test | Friedmann test: P < 0.0001 Dunn's multiple comparison test: CS- vs CSearly, P < 0.0001 CS- vs CSlate , P > 0.9999 CSearly vs CSlate, P < 0.0001 |
| Extended Data Fig. 1f | CSdownPostup Extinction CS AUC CS- vs CSearly vs CSlate | 21 | NA | Friedman test   *post-hoc* Dunn's multiple comparison test | Friedmann test: P = 0.0051 Dunn's multiple comparison test: CS- vs CSearly, P = 0.0036 CS- vs CSlate , P = 0.1922 CSearly vs CSlate, P = 0.4947 |
| Extended Data Fig. 1g | CSdownPostup Extinction post-CS AUC CS- vs CSearly vs CSlate | 21 | NA | Friedman test   *post-hoc* Dunn's multiple comparison test | Friedmann test: P = 0.0131 Dunn's multiple comparison test: CS- vs CSearly, P = 0.0407 CS- vs CSlate , P > 0.9999 CSearly vs CSlate, P = 0.0261 |
| Extended Data Fig. 1i | pre-CS1 weight CSupPostdown vs  CSupPostup, CSnoPostup, CSdownPostup | 57, 59, 36, 21 | NA | Kruskal-Wallis test | P = 0.3817 |
| Extended Data Fig. 1i | pre-CS2 weight CSupPostdown vs  CSupPostup, CSnoPostup, CSdownPostup | 57, 59, 36, 21 | NA | Kruskal-Wallis test | P = 0.1614 |
| Extended Data Fig. 1i | pre-CS3 weight CSupPostdown vs  CSupPostup, CSnoPostup, CSdownPostup | 57, 59, 36, 21 | NA | Kruskal-Wallis test  *post-hoc* Dunn's multiple comparison test | P = 0.0701 |
| Extended Data Fig. 1i | pre-CS4 weight CSupPostdown vs  CSupPostup, CSnoPostup, CSdownPostup | 57, 59, 36, 21 | NA | Kruskal-Wallis test  *post-hoc* Dunn's multiple comparison test | Kruskal-Wallis test: P = 0.0158 Dunn's multiple comparison test: CSupPostdown vs CSupPostup, P = 0.0067  CSupPostdown vs CSnoPostup, P = 0.1501 CSupPostdown vs CSdownPostup, P = 0.1642 |
| Extended Data Fig. 1i | CS1 weight CSupPostdown vs  CSupPostup, CSnoPostup, CSdownPostup | 57, 59, 36, 21 | NA | Kruskal-Wallis test | P = 0.2844 |
| Extended Data Fig. 1i | CS2 weight CSupPostdown vs  CSupPostup, CSnoPostup, CSdownPostup | 57, 59, 36, 21 | NA | Kruskal-Wallis test  *post-hoc* Dunn's multiple comparison test | Kruskal-Wallis test: P = 0.0195 Dunn's multiple comparison test: CSupPostdown vs CSupPostup, P = 0.0220  CSupPostdown vs CSnoPostup, P = 0.0464 CSupPostdown vs CSdownPostup, P = 0.1189 |
| Extended Data Fig. 1i | CS3 weight CSupPostdown vs  CSupPostup  CSnoPostup, CSdownPostup | 57, 59, 36, 21 | NA | Kruskal-Wallis test | Kruskal-Wallis test: P = 0.0087 Dunn's multiple comparison test: CSupPostdown vs CSupPostup, P = 0.1007  CSupPostdown vs CSnoPostup, P = 0.0026 CSupPostdown vs CSdownPostup, P = 0.5457 |
| Extended Data Fig. 1i | CS4 weight CSupPostdown vs  CSupPostup  CSnoPostup, CSdownPostup | 57, 59, 36, 21 | NA | Kruskal-Wallis test  *post-hoc* Dunn's multiple comparison test | Kruskal-Wallis test: P = 0.0125 Dunn's multiple comparison test: CSupPostdown vs CSupPostup, P = 0.0087  CSupPostdown vs CSnoPostup, P = 0.0410 CSupPostdown vs CSdownPostup, P = 0.1841 |
| Extended Data Fig. 1i | post-CS1 weight CSupPostdown vs  CSupPostup  CSnoPostup, CSdownPostup | 57, 59, 36, 21 | NA | Kruskal-Wallis test | P = 0.1033 |
| Extended Data Fig. 1i | post-CS2 weight CSupPostdown vs  CSupPostup  CSnoPostup, CSdownPostup | 57, 59, 36, 21 | NA | Kruskal-Wallis test  *post-hoc* Dunn's multiple comparison test | Kruskal-Wallis test: P = 0.0109 Dunn's multiple comparison test: CSupPostdown vs CSupPostup, P = 0.0171  CSupPostdown vs CSnoPostup, P = 0.0206 CSupPostdown vs CSdownPostup, P = 0.0999 |
| Extended Data Fig. 1i | post-CS3 weight CSupPostdown vs  CSupPostup,  CSnoPostup,  CSdownPostup | 57, 59, 36, 21 | NA | Kruskal-Wallis test  *post-hoc* Dunn's multiple comparison test | Kruskal-Wallis test: P = 0.0163 Dunn's multiple comparison test: CSupPostdown vs CSupPostup, P = 0.0191  CSupPostdown vs CSnoPostup, P = 0.1610 CSupPostdown vs CSdownPostup, P = 0.0368 |
| Extended Data Fig. 1i | post-CS4 weight CSupPostdown vs  CSupPostup,  CSnoPostup,  CSdownPostup | 57, 59, 36, 21 | NA | Kruskal-Wallis test | P = 0.2582 |
| Extended Data Fig. 2e | CSupPostdown Aversive condition CS AUC CS+1 vs CS+5 | 57 | normal | Paired t test | T(27) = 2.186, P = 0.0377 |
| Extended Data Fig. 2e | CSupPostdown Aversive condition shock AUC CS+1 vs CS+5 | 57 | non-normal | Wilcoxon matched-pairs signed rank test | P = 0.6947 |
| Extended Data Fig. 2f | CSdownPostdown Aversive condition CS AUC CS+1 vs CS+5 | 104 | non-normal | Wilcoxon matched-pairs signed rank test | P = 0.0279 |
| Extended Data Fig. 2f | CSdownPostdown Aversive condition shock AUC CS+1 vs CS+5 | 104 | non-normal | Wilcoxon matched-pairs signed rank test | P = 0.0452 |
| Extended Data Fig. 2g | CSupPostup Aversive condition CS AUC CS+1 vs CS+5 | 59 | normal | Paired t test | T(29) = 0.3935, P = 0.6969 |
| Extended Data Fig. 2g | CSupPostup Aversive condition shock AUC CS+1 vs CS+5 | 59 | normal | Paired t test | T(29) = 0.2660, P = 0.7922 |
| Extended Data Fig. 2h | CSdownPostup Aversive condition CS AUC CS+1 vs CS+5 | 21 | non-normal | Wilcoxon matched-pairs signed rank test | P = 0.7869 |
| Extended Data Fig. 2h | CSdownPostup Aversive condition shock AUC CS+1 vs CS+5 | 21 | normal | Paired t test | T(12) = 2.100, P = 0.0575 |
| Extended Data Fig. 3d | mean CS signal between reward and omission in all neurons | 131 | non-normal | Wilcoxon matched-pairs signed rank test | P = 0.5082 |
| Extended Data Fig. 3d | mean Post-CS signal between reward and omission in all neurons | 131 | normal | Paired t test | T(130) = 3.656 , P = 0.0003703 |
| Extended Data Fig. 3e | mean CS signal between reward and omission in CSupPostdown | 17 | Non-normal | Wilcoxon matched-pairs signed rank test | P = 0.1314 |
| Extended Data Fig. 3e | mean Post-CS signal between reward and omission in CSupPostdown | 17 | Non-normal | Wilcoxon matched-pairs signed rank test | P = 0.00717 |
| Extended Data Fig. 3h | Weights of Other,  Weights of CSupPostdown | 114  17 | non-normal | Mann-Whitney U test | P = 0.02045 |
| Extended Data Fig. 3i | mean CS signal between reward and omission in top 20 weight neurons | 26 | normal | Paired t test | T(25) = -0.9903, P = 0.3315 |
| Extended Data Fig. 3i | mean Post-CS signal between reward and omission in top 20 weight neurons | 26 | normal | Paired t test | T(25) = 2.299 P = 0.03015 |
| Extended Data Fig. 5b | vmPFC Retrieval CS AUC CSearly vs CS6-10 | 8 | normal | Paired t test | T(7) = 0.4222, P = 0.6855 |
| Extended Data Fig. 5b | vmPFC Retrieval post-CS AUC CSearly vs CS6-10 | 8 | normal | Paired t test | T(7) = 0.4008, P = 0.7005 |
| Extended Data Fig. 5b | NAc Retrieval CS AUC CSearly vs CS6-10 | 9 | normal | Paired t test | T(8) = -0.2679, P = 0.7956 |
| Extended Data Fig. 5b | NAc Retrieval post-CS AUC CSearly vs CS6-10 | 9 | normal | Paired t test | T(8) = 1.4232, P = 0.1925 |
| Extended Data Fig. 5b | BA Retrieval CS AUC CSearly vs CS6-10 | 11 | normal | Paired t test | T(10) = -1.2450, P = 0.2415 |
| Extended Data Fig. 5b | BA Retrieval post-CS AUC CSearly vs CS6-10 | 11 | non-normal | Wilcoxon matched-pairs signed rank test | P = 1 |
| Extended Data Fig. 6c | vmPFC inhibition Extinction freezing during pre-CS Jaws vs control | 12, 16 | NA | Two-way RM ANOVA  *post-hoc* Holm sidak test | interaction: F19, 494 = 1.150, P = 0.2973 main effect of inhibition: F1, 26 = 1.721, P = 0.2011 |
| Extended Data Fig. 6c | NAc inhibition Extinction freezing during pre-CS Jaws vs control | 7, 8 | NA | Two-way RM ANOVA  *post-hoc* Holm sidak test | interaction: F19, 247 = 0.4205, P = 0.9853 main effect of inhibition: F1, 13 = 4.940, P =0.0446 |
| Extended Data Fig. 6c | BA inhibition Extinction freezing during pre-CS Jaws vs control | 14, 16 | NA | Two-way RM ANOVA  *post-hoc* Holm sidak test | interaction: F19, 532 = 1.023, P = 0.4324 main effect of inhibition: F1, 28 = 1.539, P = 0.2250 |
| Extended Data Fig. 6d | vmPFC inhibition Extinction freezing during post-CS Jaws vs control | 12, 16 | NA | Two-way RM ANOVA  *post-hoc* Holm sidak test | interaction: F19, 494 = 1.155, P = 0.2928 main effect of inhibition: F1, 26 = 0.6949, P = 0.4121 |
| Extended Data Fig. 6d | NAc inhibition Extinction freezing during post-CS Jaws vs control | 7, 8 | NA | Two-way RM ANOVA  *post-hoc* Holm sidak test | interaction: F19, 247 = 0.4189, P = 0.9856 main effect of inhibition: F1, 13 = 1.985, P = 0.1823 |
| Extended Data Fig. 6d | BA inhibition Extinction freezing during post-CS Jaws vs control | 14, 16 | NA | Two-way RM ANOVA  *post-hoc* Holm sidak test | interaction: F19, 532 = 1.625, P = 0.0459 main effect of inhibition: F1, 28 = 0.1151, P = 0.7369 |
| Extended Data Fig. 7c | vmPFC activation Extinction freezing during pre-CS Chrimson vs control | 8, 10 | NA | Two-way RM ANOVA  *post-hoc* Holm sidak test | interaction: F19, 304 = 1.320, P = 0.1687 main effect of activation: F1, 16 = 1.522, P = 0.2352 |
| Extended Data Fig. 7c | NAc activation Extinction freezing during pre-CS Chrimson vs control | 8, 11 | NA | Two-way RM ANOVA  *post-hoc* Holm sidak test | interaction: F19, 323 = 0.4579, P = 0.9765 main effect of activation: F1, 17 = 0.1615, P = 0.6927 |
| Extended Data Fig. 7c | BA activation Extinction freezing during pre-CS Chrimson vs control | 7, 11 | NA | Two-way RM ANOVA  *post-hoc* Holm sidak test | interaction: F19, 304 = 1.494, P = 0.0857 main effect of activation: F1, 16 = 4.281, P = 0.0551 |
| Extended Data Fig. 7d | vmPFC activation Extinction freezing during post-CS Chrimson vs control | 8, 10 | NA | Two-way RM ANOVA  *post-hoc* Holm sidak test | interaction: F19, 304 = 1.069, P = 0.3825 main effect of activation: F1, 16 = 2.784, P = 0.1147 |
| Extended Data Fig. 7d | NAc activation Extinction freezing during post-CS Chrimson vs control | 8, 11 | NA | Two-way RM ANOVA  *post-hoc* Holm sidak test | interaction: F19, 323 = 1.253, P = 0.2133 main effect of activation: F1, 17 = 0.2837, P = 0.6012 |
| Extended Data Fig. 7d | BA activation Extinction freezing during post-CS Chrimson vs control | 7, 11 | NA | Two-way RM ANOVA  *post-hoc* Holm sidak test | interaction: F19, 304 = 0.8784, P = 0.6104 main effect of activation: F1, 16 = 4.454, P = 0.0509 |
| Extended Data Fig. 8a | CSnoPostdown freezing onset before vs after onset | 46 | NA | Wilcoxon matched-pairs signed rank test | P < 0.0001 |
| Extended Data Fig. 8a | CSnoPostdown freezing offset before vs after offset | 46 | NA | Wilcoxon matched-pairs signed rank test | P < 0.0001 |
| Extended Data Fig. 8b | CSdownPostdown freezing onset before vs after onset | 104 | NA | Wilcoxon matched-pairs signed rank test | P = 0.0197 |
| Extended Data Fig. 8b | CSdownPostdown freezing offset before vs after offset | 104 | NA | Wilcoxon matched-pairs signed rank test | P = 0.0032 |
| Extended Data Fig. 8c | CSupPostup freezing onset before vs after onset | 59 | NA | Wilcoxon matched-pairs signed rank test | P = 0.1125 |
| Extended Data Fig. 8c | CSupPostup freezing offset before vs after offset | 59 | NA | Wilcoxon matched-pairs signed rank test | P = 0.1450 |
| Extended Data Fig. 8d | CSnoPostup freezing onset before vs after onset | 36 | NA | Wilcoxon matched-pairs signed rank test | P = 0.9074 |
| Extended Data Fig. 8d | CSnoPostup freezing offset before vs after offset | 36 | NA | Wilcoxon matched-pairs signed rank test | P = 0.6807 |
| Extended Data Fig. 8e | CSdownPostup freezing onset before vs after onset | 21 | NA | Wilcoxon matched-pairs signed rank test | P = 0.3038 |
| Extended Data Fig. 8e | CSdownPostup freezing offset before vs after offset | 21 | NA | Wilcoxon matched-pairs signed rank test | P = 0.0195 |
| Extended Data Fig. 9c | vmPFC CS freeze vs post-CS freeze | 8 | normal | Paired t test | T(7) = 1.899, P = 0.0994 |
| Extended Data Fig. 9c | NAc CS freeze vs post-CS freeze | 9 | normal | Paired t test | T(8) = 2.531, P = 0.0352 |
| Extended Data Fig. 9c | BA CS freeze vs post-CS freeze | 11 | normal | Paired t test | T(10) = 3.006, P = 0.0132 |
| Extended Data Fig. 9e | vmPFC immobility onset before vs after onset | 6 | NA | Wilcoxon matched-pairs signed rank test | P = 0.1563 |
| Extended Data Fig. 9e | vmPFC immobility offset before vs after offset | 5 | NA | Wilcoxon matched-pairs signed rank test | P = 0.3125 |
| Extended Data Fig. 9e | NAc immobility onset before vs after onset | 7 | NA | Wilcoxon matched-pairs signed rank test | P = 0.0781 |
| Extended Data Fig. 9e | NAc immobility offset before vs after offset | 6 | NA | Wilcoxon matched-pairs signed rank test | P = 0.3125 |
| Extended Data Fig. 9e | BA immobility onset before vs after onset | 9 | NA | Wilcoxon matched-pairs signed rank test | P = 0.4961 |
| Extended Data Fig. 9e | BA immobility offset before vs after offset | 9 | NA | Wilcoxon matched-pairs signed rank test | P = 0.0742 |
| Extended Data Fig. 9f | vmPFC immobility vs non-immobility | 7, 8 | normal | Unpaired t test with Welch's correction | T(6.723) = 0.4504, P = 0.6666 |
| Extended Data Fig. 9f | NAc immobility vs non-immobility | 8, 9 | normal | Unpaired t test with Welch's correction | T(7.988) = 0.4462, P = 0.6673 |
| Extended Data Fig. 9f | BA immobility vs non-immobility | 10, 11 | normal | Unpaired t test with Welch's correction | T(12.96) = 0.08278, P = 0.9353 |
| Extended Data Fig. 10a | vmPFC freezing-triggered inhibition Extinction freezing during pre-CS Jaws vs control | 6, 6 | NA | Two-way RM ANOVA  *post-hoc* Holm sidak test | interaction: F19, 190 = 0.9147, P = 0.5653 main effect of inhibition: F1, 10 = 0.7124, P = 0.4184 |
| Extended Data Fig. 10a | NAc freezing-triggered inhibition Extinction freezing during pre-CS Jaws vs control | 4, 4 | NA | Two-way RM ANOVA  *post-hoc* Holm sidak test | interaction: F19, 114 = 0.8562, P = 0.6363 main effect of inhibition: F1, 6 = 7.101, P = 0.0373 |
| Extended Data Fig. 10a | BA freezing-triggered inhibition Extinction freezing during pre-CS Jaws vs control | 6, 8 | NA | Two-way RM ANOVA  *post-hoc* Holm sidak test | interaction: F19, 228 = 1.469, P = 0.0979 main effect of inhibition: F1, 12 = 0.2625, P = 0.6177 |
| Extended Data Fig. 10b | vmPFC freezing-triggered inhibition Extinction freezing during post-CS Jaws vs control | 6, 6 | NA | Two-way RM ANOVA  *post-hoc* Holm sidak test | interaction: F19, 190 = 0.5925, P = 0.9089 main effect of inhibition: F1, 10 = 1.118, P = 0.3152 |
| Extended Data Fig. 10b | NAc freezing-triggered inhibition Extinction freezing during post-CS Jaws vs control | 4, 4 | NA | Two-way RM ANOVA  *post-hoc* Holm sidak test | interaction: F19, 114 = 0.6649, P = 0.8460 main effect of inhibition: F1, 6 = 3.576, P = 0.1075 |
| Extended Data Fig. 10b | BA freezing-triggered inhibition Extinction freezing during post-CS Jaws vs control | 6, 8 | NA | Two-way RM ANOVA  *post-hoc* Holm sidak test | interaction: F19, 228 = 1.262, P = 0.2106 main effect of inhibition: F1, 12 = 0.1974, P = 0.6648 |
| Extended Data Fig. 10c | vmPFC non-freezing-triggered inhibition Extinction freezing during pre-CS Jaws vs control | 5, 5 | NA | Two-way RM ANOVA  *post-hoc* Holm sidak test | interaction: F19, 152 = 1.289, P = 0.1981 main effect of inhibition: F1, 8 = 0.02342, P = 0.8822 |
| Extended Data Fig. 10c | NAc non-freezing-triggered inhibition Extinction freezing during pre-CS Jaws vs control | 3, 4 | NA | Two-way RM ANOVA  *post-hoc* Holm sidak test | interaction: F19, 95 = 0.8463, P = 0.6476 main effect of inhibition: F1, 5 = 1.206, P = 0.3222 |
| Extended Data Fig. 10c | BA non-freezing-triggered inhibition Extinction freezing during pre-CS Jaws vs control | 8, 7 | NA | Two-way RM ANOVA  *post-hoc* Holm sidak test | interaction: F19, 247 = 1.792, P = 0.0242 main effect of inhibition: F1, 13 = 0.01844, P = 0.8941 |
| Extended Data Fig. 10d | vmPFC non-freezing-triggered inhibition Extinction freezing during post-CS Jaws vs control | 5, 5 | NA | Two-way RM ANOVA  *post-hoc* Holm sidak test | interaction: F19, 152 = 1.400, P = 0.1343 main effect of inhibition: F1, 8 = 0.006404, P = 0.9382 |
| Extended Data Fig. 10d | NAc non-freezing-triggered inhibition Extinction freezing during post-CS Jaws vs control | 3, 4 | NA | Two-way RM ANOVA  *post-hoc* Holm sidak test | interaction: F19, 95 = 1.190, P = 0.2829 main effect of inhibition: F1, 5 = 0.6570, P = 0.4545 |
| Extended Data Fig. 10d | BA non-freezing-triggered inhibition Extinction freezing during post-CS Jaws vs control | 8, 7 | NA | Two-way RM ANOVA  *post-hoc* Holm sidak test | interaction: F19, 247 = 1.381, P = 0.1365 main effect of inhibition: F1, 13 = 0.0004848, P = 0.9828 |

**Supplementary Table 2**

| Figure | Cell type | Trough or Peak latency from post-CS onset during CSearly (s) |
| --- | --- | --- |
| Fig. 1f | CSupPostdown cells | 10.6 ± 0.8 |
| Fig. 1g | CSdownPostdown cells | 9.7 ± 0.6 |
| Extended Data Fig. 1e | CSupPostup cells | 9.0 ± 0.8 |
| Extended Data Fig. 1f | CSdownPostup cells | 9.5 ± 1.0 |

Supplementary Table 3

| Figure | Projection area | Trough Latency from post-CS onset during CSearly (s) |
| --- | --- | --- |
| Fig. 2f | vmPFC | 6.8 ± 1.5 |
| NAc | 11.5 ± 1.7 |
| BA | 9.9 ± 1.3 |
